# Supplementary material
Source: bioRxiv or medRxiv preprint supplement (https://medrxiv.org/highwire/filestream/81156/field_highwire_adjunct_files/0/2020.05.13.20099796-1.pdf)
Supplement: Supplementary file [file 2020.05.13.20099796-1.pdf]

**Supplementary Table S1.** Characteristics of the countries included in the analysis\*

| Country                | Total population | Date of first case reported | Total confirmed cases | Total death | Total recovered | Test† | CRF  | dCFR | Difference | Critical care beds per 100 000 hab | Proportion of habitants over 65 year | HCW (MDs) per 1 000 hab |
|------------------------|------------------|-----------------------------|-----------------------|-------------|-----------------|-------|------|------|------------|------------------------------------|--------------------------------------|-------------------------|
| Afghanistan            | 37172386         | 24 February                 | 2171                  | 64          | 260             | 0     | 2.9  | 6.3  | 3.4        | 0.5                                | 3                                    | 0.3                     |
| Albania                | 2878249          | 8 March                     | 773                   | 31          | 470             | 0     | 4.0  | 5.6  | 1.6        | NA                                 | 14                                   | 1.2                     |
| Algeria                | 42228429         | 25 February                 | 4006                  | 450         | 1779            | 0     | 11.2 | 18.1 | 6.9        | 1.9                                | 6                                    | 1.8                     |
| Andorra                | 77006            | 02 March                    | 745                   | 42          | 468             | 0     | 5.6  | 6.5  | 0.9        | 7.1                                | NA                                   | 3.3                     |
| Argentina              | 44494502         | 03 March                    | 4428                  | 218         | 1256            | 0     | 4.9  | 7.8  | 2.9        | 18.6                               | 11                                   | 4.0                     |
| Armenia                | 2951776          | 01 March                    | 2066                  | 32          | 929             | 0     | 1.5  | 2.5  | 0.9        | 4.2                                | 11                                   | 2.9                     |
| Australia              | 25 203 198       | 26 March                    | 6766                  | 93          | 5742            | 1     | 1.4  | 1.5  | 0.1        | 8                                  | 16                                   | 3.6                     |
| Austria                | 8 840 521        | 25 February                 | 15452                 | 584         | 12907           | 1     | 3.8  | 4.3  | 0.5        | 21.8                               | 19                                   | 5.1                     |
| Azerbaijan             | 9939800          | 29 February                 | 1804                  | 24          | 1325            | 1     | 1.3  | 1.9  | 0.5        | 4.7                                | 6                                    | 3.4                     |
| Bahrain                | 1569439          | 24 February                 | 3040                  | 8           | 1500            | 1     | 0.3  | 0.4  | 0.2        | 2                                  | 2                                    | 0.9                     |
| Bangladesh             | 161356039        | 08 March                    | 7667                  | 168         | 160             | 0     | 2.2  | 5.7  | 3.5        | 0.7                                | 5                                    | 0.5                     |
| Belarus                | 9483499          | 28 February                 | 14027                 | 89          | 2386            | 1     | 0.6  | 1.5  | 0.8        | 11                                 | 15                                   | 4.1                     |
| Belgium                | 11 539 328       | 04 February                 | 48519                 | 7594        | 11576           | 0     | 15.7 | 21.3 | 5.7        | 15.9                               | 19                                   | 3.3                     |
| Bolivia                | 11,648,426       | 12 March                    | 1110                  | 59          | 117             | 0     | 5.3  | 10.4 | 5.1        | NA                                 | 7                                    | 0.5                     |
| Bosnia and Herzegovina | 3323929          | 05 March                    | 1757                  | 69          | 727             | 0     | 3.9  | 5.8  | 1.9        | 3.5                                | 16                                   | 2.0                     |
| Brazil                 | 211 049 527      | 25 February                 | 87187                 | 6006        | 35935           | 0     | 6.9  | 15.2 | 8.3        | 25                                 | 9                                    | 2.1                     |
| Bulgaria               | 7 025 037        | 08 March                    | 1506                  | 66          | 266             | 0     | 4.4  | 7.2  | 2.8        | 12.2                               | 21                                   | 4.0                     |
| Burkina Faso           | 19751535         | 11 March                    | 645                   | 43          | 506             | 0     | 6.7  | 8.1  | 1.5        | 0.4                                | 2                                    | 0.1                     |
| Cameroon               | 25216237         | 06 March                    | 1832                  | 61          | 934             | 0     | 3.3  | 5.6  | 2.3        | 1.3                                | 3                                    | 0.1                     |
| Canada                 | 37 411 047       | 27 January                  | 54457                 | 3310        | 21424           | 1     | 6.1  | 9.6  | 3.6        | 9.5                                | 17                                   | 2.6                     |
| Chile                  | 18729160         | 03 March                    | 16023                 | 227         | 8580            | 0     | 1.4  | 2.4  | 0.9        | 6.7                                | 12                                   | 1.1                     |
| China                  | 1 433 783 686    | 17 November*                | 82919                 | 4633        | 77677           | 0     | 5.6  | 5.6  | 0.1        | 3.6                                | 11                                   | 1.8                     |
| Colombia               | 49648685         | 06 March                    | 6507                  | 293         | 1439            | 0     | 4.5  | 7.9  | 3.4        | 11                                 | 8                                    | 2.1                     |

|                    |            |             |        |       |        |   |      |      |     |      |    |     |
|--------------------|------------|-------------|--------|-------|--------|---|------|------|-----|------|----|-----|
| Congo              | 89114668   | 10 March    | 572    | 31    | 73     | 0 | 5.4  | 10.0 | 6.6 | NA   | 3  | 0.1 |
| Costa Rica         | 4999441    | 08 March    | 719    | 6     | 338    | 0 | 0.8  | 1.0  | 0.2 | 1.2  | 10 | 1.1 |
| Cote d'Ivoire      | 25069229   | 12 March    | 1275   | 14    | 574    | 0 | 1.1  | 1.8  | 0.7 | 0.4  | 3  | 0.2 |
| Croatia            | 4 087 843  | 25 February | 2076   | 69    | 1348   | 0 | 3.3  | 4.0  | 0.7 | 14.7 | 20 | 3.0 |
| Cuba               | 11338138   | 13 March    | 1501   | 61    | 681    | 0 | 4.1  | 6.3  | 2.2 | 5.2  | 15 | 8.2 |
| Cyprus             | 1189265    | 09 March    | 850    | 15    | 296    | 1 | 1.8  | 2.2  | 0.4 | 11.4 | 14 | 2.0 |
| Czechia            | 10 629 928 | 01 March    | 7682   | 236   | 3314   | 1 | 3.1  | 3.6  | 0.5 | 11.6 | 19 | 4.3 |
| Denmark            | 5 793 636  | 27 February | 9158   | 452   | 6545   | 1 | 4.9  | 6.6  | 1.6 | 6.7  | 20 | 4.5 |
| Diamond Princess   | 3800       | 2 February  | 712    | 13    | 645    | 1 | 1.8  | 1.8  | 0.0 | NA   | NA | NA  |
| Djibouti           | 958920     | 14 March    | 1089   | 2     | 642    | 1 | 0.2  | 0.3  | 0.1 | NA   | 5  | 0.2 |
| Dominican Republic | 10627165   | 02 March    | 6972   | 301   | 1301   | 0 | 4.3  | 6.9  | 2.6 | 1.6  | 7  | 1.6 |
| Ecuador            | 17084357   | 29 February | 24934  | 900   | 1558   | 0 | 3.6  | 7.3  | 3.7 | 6.7  | 7  | 2.0 |
| Egypt              | 98423595   | 14 February | 5537   | 392   | 1381   | 0 | 7.1  | 12.6 | 5.5 | 1.6  | 5  | 0.8 |
| Estonia            | 1 321 977  | 27 February | 1689   | 52    | 249    | 1 | 3.1  | 3.7  | 0.6 | 14.6 | 20 | 3.5 |
| Finland            | 5 515 525  | 29 January  | 4995   | 211   | 3000   | 1 | 4.2  | 5.9  | 1.7 | 6.1  | 22 | 3.8 |
| France             | 66 977 107 | 24 January  | 175234 | 24376 | 49476  | 0 | 13.9 | 18.1 | 4.2 | 11.6 | 20 | 3.2 |
| Georgia            | #####      | 26 February | 539    | 6     | 184    | 0 | 1.1  | 1.7  | 0.6 | NA   | 15 | 4.3 |
| Germany            | 82 905 782 | 28 January  | 163009 | 6623  | 123500 | 1 | 4.1  | 5.0  | 0.9 | 29.2 | 21 | 4.2 |
| Ghana              | 10 473 455 | 26 February | 2074   | 17    | 212    | 0 | 0.8  | 1.8  | 1.0 | 6    | 3  | 0.2 |
| Greece             | 10 731 726 | 26 February | 2591   | 140   | 1374   | 0 | 5.4  | 6.5  | 1.1 | 6    | 22 | 4.6 |
| Guatemala          | 17864383   | 13 March    | 599    | 16    | 66     | 0 | 2.7  | 5.5  | 2.8 | NA   | 5  | 0.9 |
| Guinea             | 13,075,037 | 13 March    | 1495   | 7     | 329    | 0 | 0.5  | 1.1  | 0.6 | NA   | 3  | 0.1 |
| Honduras           | 9,880,507  | 10 March    | 771    | 71    | 79     | 0 | 9.2  | 15.3 | 6.1 | NA   | 5  | 0.6 |
| Hong kong          | 7 451 000  | 23 January  | 1037   | 4     | 846    | 1 | 0.4  | 0.4  | 0.0 | 7.1  | 17 | 1.3 |
| Hungary            | 9 775 564  | 04 March    | 2775   | 312   | 581    | 0 | 11.2 | 17.1 | 5.9 | 13.8 | 19 | 3.2 |
| Iceland            | 339 031    | 24 March    | 1797   | 10    | 1670   | 1 | 0.6  | 0.6  | 0.1 | 9.1  | 15 | 4.0 |

|                 |             |             |        |       |       |   |      |      |      |      |    |     |
|-----------------|-------------|-------------|--------|-------|-------|---|------|------|------|------|----|-----|
| India           | 1352617328  | 30 January  | 34863  | 1154  | 9068  | 0 | 3.3  | 6.6  | 3.3  | 2.3  | 6  | 0.8 |
| Indonesia       | 267663435   | 02 March    | 10118  | 792   | 1522  | 0 | 7.8  | 12.8 | 4.9  | 2.7  | 6  | 0.4 |
| Iran            | 82 913 906  | 19 February | 94640  | 6028  | 75103 | 0 | 6.4  | 7.9  | 1.5  | 4.6  | 6  | 1.1 |
| Iraq            | 38433600    | 24 February | 2085   | 93    | 1375  | 0 | 4.5  | 6.4  | 1.9  | 1.4  | 3  | 0.8 |
| Ireland         | 4867309     | 01 March    | 20612  | 1232  | 13386 | 0 | 6.0  | 8.9  | 2.9  | 6.5  | 14 | 3.1 |
| Israel          | 8 519 377   | 21 February | 15946  | 222   | 8561  | 1 | 1.4  | 1.8  | 0.4  | 3.1  | 12 | 3.2 |
| Italy           | 60 421 760  | 29 January  | 205463 | 27967 | 75945 | 0 | 13.6 | 16.7 | 3.1  | 12.5 | 23 | 4,1 |
| Japan           | 126 529 100 | 16 January  | 14088  | 430   | 2460  | 0 | 3.1  | 4.4  | 1.4  | 7.3  | 28 | 2.4 |
| Kazakhstan      | 18272430    | 14 March    | 3402   | 25    | 866   | 1 | 0.7  | 1.4  | 0.7  | 21.3 | 7  | 3.3 |
| Korea, South    | 51 225 308  | 20 January  | 10774  | 248   | 9072  | 1 | 2.3  | 2.4  | 0.1  | 10.6 | 14 | 2.4 |
| Kosovo          | 1,810,366   | 13 March    | 799    | 22    | 249   | 0 | 2.8  | 5.4  | 2.6  | NA   | NA | NA  |
| Kuwait          | 4137309     | 24 March    | 4024   | 26    | 1539  | 1 | 0.6  | 1.3  | 0.7  | 2    | 3  | 2.6 |
| Kyrgyzstan      | 6507397     | 18 March    | 746    | 8     | 462   | 0 | 1.1  | 1.6  | 0.5  | NA   | 4  | 2.0 |
| Latvia          | 1 927 174   | 02 March    | 858    | 15    | 348   | 1 | 1.7  | 2.2  | 0.5  | 9.7  | 20 | 3.2 |
| Lebanon         | 6848925     | 21 February | 725    | 24    | 150   | 0 | 3.3  | 3.8  | 0.5  | 2.9  | 7  | 2.3 |
| Lithuania       | 2 801 543   | 28 February | 1385   | 45    | 589   | 1 | 3.2  | 3.8  | 0.6  | 15.5 | 20 | 4.3 |
| Luxembourg      | 607950      | 01 March    | 3784   | 90    | 3213  | 1 | 2.4  | 2.7  | 0.4  | 24.8 | 14 | 3.0 |
| Malaysia        | 31 949 777  | 25 January  | 6002   | 102   | 4171  | 0 | 1.7  | 2.1  | 0.4  | 3.4  | 7  | 1.5 |
| Mexico          | 126190788   | 28 February | 19224  | 1859  | 11423 | 0 | 9.7  | 20.9 | 11.2 | 2    | 7  | 2.2 |
| Moldova         | 2706049     | 07 March    | 3897   | 116   | 1182  | 0 | 3.0  | 4.9  | 1.9  | 5.8  | 11 | 3.2 |
| Morocco         | 36029138    | 02 March    | 4423   | 170   | 984   | 0 | 3.8  | 6.2  | 2.3  | 1.1  | 7  | 0.7 |
| Netherlands     | 17 097 130  | 27 February | 39316  | 4795  | 0     | 0 | 12.2 | 16.0 | 3.8  | 6.4  | 19 | 3.5 |
| New Zealand     | 4841000     | 28 February | 1479   | 19    | 1252  | 1 | 1.3  | 1.5  | 0.2  | 2.8  | 16 | 3.0 |
| Niger           | 22442948    | 19 March    | 719    | 32    | 452   | 0 | 4.5  | 5.8  | 1.3  | 0.3  | 3  | 0.4 |
| Nigeria         | 204630242   | 27 February | 1932   | 58    | 319   | 0 | 3.0  | 7.9  | 4.9  | NA   | 3  | 0.4 |
| North Macedonia | 2082958     | 26 February | 1465   | 77    | 738   | 0 | 5.3  | 7.2  | 2.0  | 4.4  | 14 | 2.9 |
| Norway          | 5 378 857   | 26 February | 7738   | 210   | 32    | 1 | 2.7  | 3.2  | 0.4  | 8    | 17 | 4.6 |

|              |            |             |        |       |        |   |      |      |     |      |    |     |
|--------------|------------|-------------|--------|-------|--------|---|------|------|-----|------|----|-----|
| Oman         | 4829483    | 24 February | 2348   | 11    | 495    | 0 | 0.5  | 0.9  | 0.4 | 14.6 | 2  | 2.0 |
| Pakistan     | 212215030  | 26 February | 16817  | 385   | 4315   | 0 | 2.3  | 4.5  | 2.2 | 1.5  | 4  | 1.0 |
| Panama       | 4176873    | 10 March    | 6532   | 188   | 576    | 0 | 2.9  | 4.5  | 1.7 | 9.5  | 8  | 1.6 |
| Peru         | 31989256   | 07 March    | 36976  | 1051  | 10405  | 0 | 2.8  | 6.5  | 3.7 | 1.5  | 8  | 1.3 |
| Philippines  | 106651922  | 30 January  | 8488   | 568   | 1043   | 0 | 6.7  | 9.8  | 3.1 | 2.2  | 5  | 1.3 |
| Poland       | 37 974 750 | 05 March    | 12877  | 644   | 3236   | 0 | 5.0  | 7.5  | 2.5 | 6.9  | 18 | 2.4 |
| Portugal     | 10 283 822 | 02 March    | 25045  | 989   | 1519   | 1 | 3.9  | 5.3  | 1.3 | 4.2  | 22 | 3.3 |
| Qatar        | 2781677    | 29 February | 13409  | 10    | 1372   | 0 | 0.1  | 0.2  | 0.1 | 1.2  | 1  | 7.7 |
| Romania      | 19 466 145 | 26 February | 12240  | 717   | 4017   | 0 | 5.9  | 8.8  | 2.9 | 21.4 | 18 | 2.3 |
| Russia       | 144478050  | 31 January  | 106498 | 1073  | 11619  | 1 | 1.0  | 2.3  | 1.3 | 8.2  | 15 | 4.0 |
| San Marino   | 33,562     | 27 February | 569    | 41    | 78     | 0 | 7.2  | 9.6  | 2.2 | NA   | NA | 5.1 |
| Saudi Arabia | 33699947   | 02 March    | 22753  | 162   | 3163   | 0 | 0.7  | 1.6  | 0.9 | 22.8 | 3  | 2.4 |
| Senegal      | 16296364   | 16 March    | 933    | 9     | 334    | 0 | 1.0  | 2.1  | 1.2 | NA   | 3  | 0.1 |
| Serbia       | 6 982 604  | 06 March    | 9009   | 179   | 1343   | 0 | 2.0  | 3.4  | 1.4 | 2.4  | 18 | 3.1 |
| Singapore    | 5 804 337  | 23 January  | 16169  | 15    | 1244   | 1 | 0.1  | 0.2  | 0.1 | 11.4 | 11 | 2.3 |
| Slovakia     | 5 446 771  | 06 March    | 1396   | 23    | 524    | 1 | 1.6  | 2.2  | 0.6 | 9.2  | 16 | 2.5 |
| Slovenia     | 2 073 894  | 04 March    | 1429   | 91    | 233    | 1 | 6.4  | 7.4  | 1.1 | 6.4  | 20 | 3.0 |
| Somalia      | 11031386   | 16 March    | 601    | 28    | 31     | 0 | 4.7  | 12.5 | 7.8 | NA   | 3  | 0.1 |
| South Africa | 57779622   | 05 March    | 5647   | 103   | 2073   | 0 | 1.8  | 3.2  | 1.4 | 8.9  | 5  | 0.9 |
| Spain        | 46 736 776 | 31 January  | 213435 | 24543 | 112050 | 0 | 11.5 | 13.7 | 2.2 | 9.7  | 19 | 4.1 |
| Sri Lanka    | 20,359,439 | 27 January  | 663    | 7     | 154    | 0 | 1.1  | 2.2  | 1.1 | NA   | 10 | 0.7 |
| Sweden       | 10 175 214 | 31 January  | 21092  | 2586  | 1005   | 0 | 12.3 | 18.9 | 6.6 | 5.8  | 20 | 5.4 |
| Switzerland  | 8 591 365  | 25 February | 29586  | 1737  | 23400  | 0 | 5.9  | 6.8  | 0.9 | 11   | 19 | 4.2 |
| Thailand     | 69428524   | 08 January  | 2954   | 54    | 2684   | 0 | 1.8  | 2.1  | 0.3 | 10.4 | 12 | 0.8 |
| Tunisia      | 11565204   | 02 March    | 994    | 41    | 305    | 0 | 4.1  | 5.2  | 1.1 | 2.3  | 8  | 1.3 |
| Turkey       | 82319724   | 11 March    | 120204 | 3174  | 48886  | 0 | 2.6  | 4.0  | 1.3 | 46   | 8  | 1.8 |
| Ukraine      | 44622516   | 03 March    | 10406  | 261   | 1238   | 0 | 2.5  | 4.8  | 2.3 | 8.8  | 16 | 3.0 |

|                      |             |            |         |       |        |   |      |      |     |      |      |     |
|----------------------|-------------|------------|---------|-------|--------|---|------|------|-----|------|------|-----|
| United Arab Emirates | 9630959     | 29 January | 12481   | 105   | 2429   | 1 | 0.8  | 1.5  | 0.7 | 1.2  | 1    | 2.4 |
| United Kingdom       | 67 530 172  | 31 January | 171253  | 26771 | 0      | 0 | 15.6 | 24.0 | 8.4 | 6.6  | 18.5 | 2.8 |
| Uruguay              | 3,449,285   | 13 March   | 643     | 17    | 417    | 0 | 2.6  | 3.4  | 0.8 | NA   | 15   | 3.7 |
| United States        | 329 064 917 | 20 January | 1069424 | 62996 | 153947 | 0 | 5.9  | 8.9  | 3.0 | 34.7 | 15.4 | 2.6 |
| Uzbekistan           | 32955400    | 16 March   | 2039    | 9     | 1133   | 0 | 0.4  | 0.7  | 0.2 | 4    | 4    | 2.4 |

\*Include also the Passenger from the Princess Diamond cruise-ship.

†Countries that have more than 10 tests performed per 1,000 habitants and less than 10% of positivity rate (1= Yes; 0= No)

CFR= case fatality rate; dCFR= delay adjusted case fatality rate.

Supplementary figure S1. Meta-analysis of recovery CFR across countries

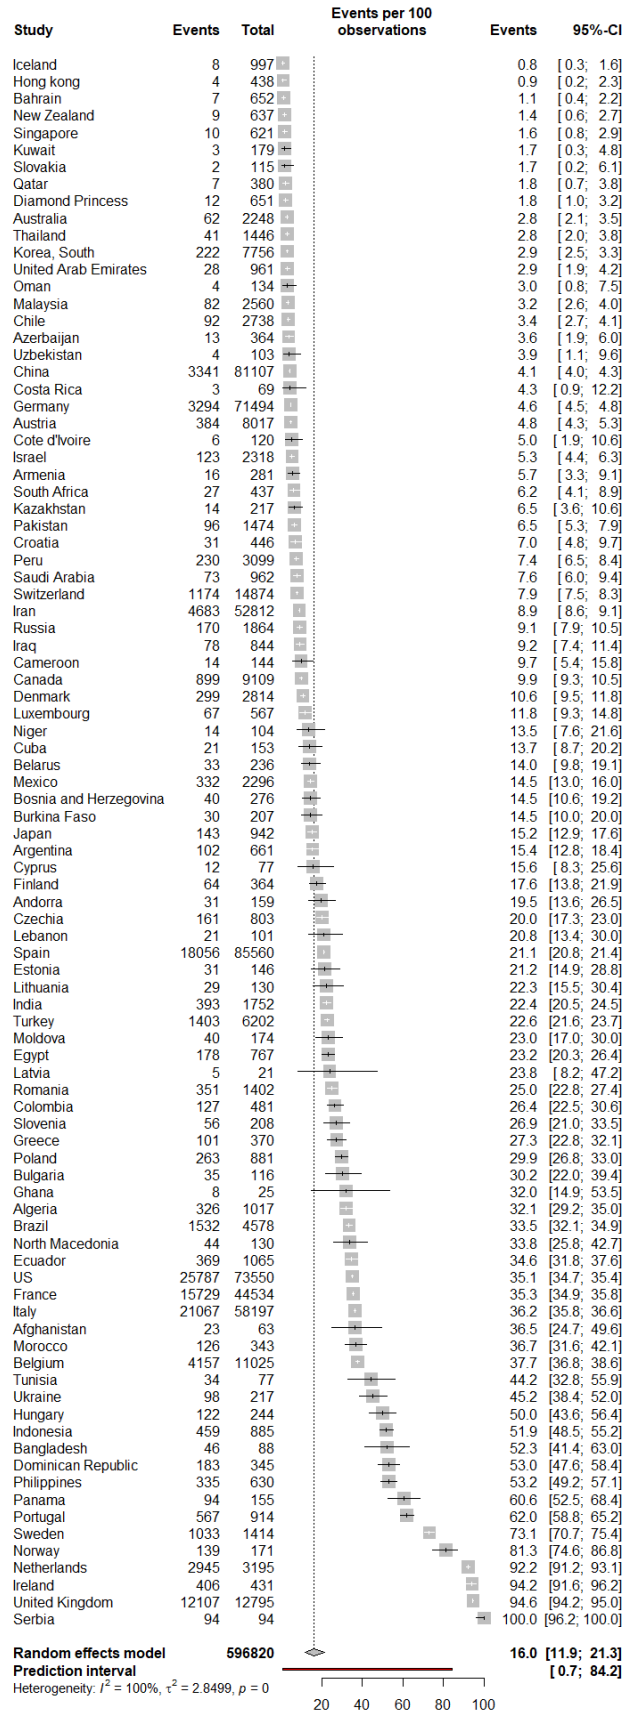

**Supplementary Figure S2.** Meta-analysis of the delay adjusted CFR across countries with high testing coverage and low positivity rate

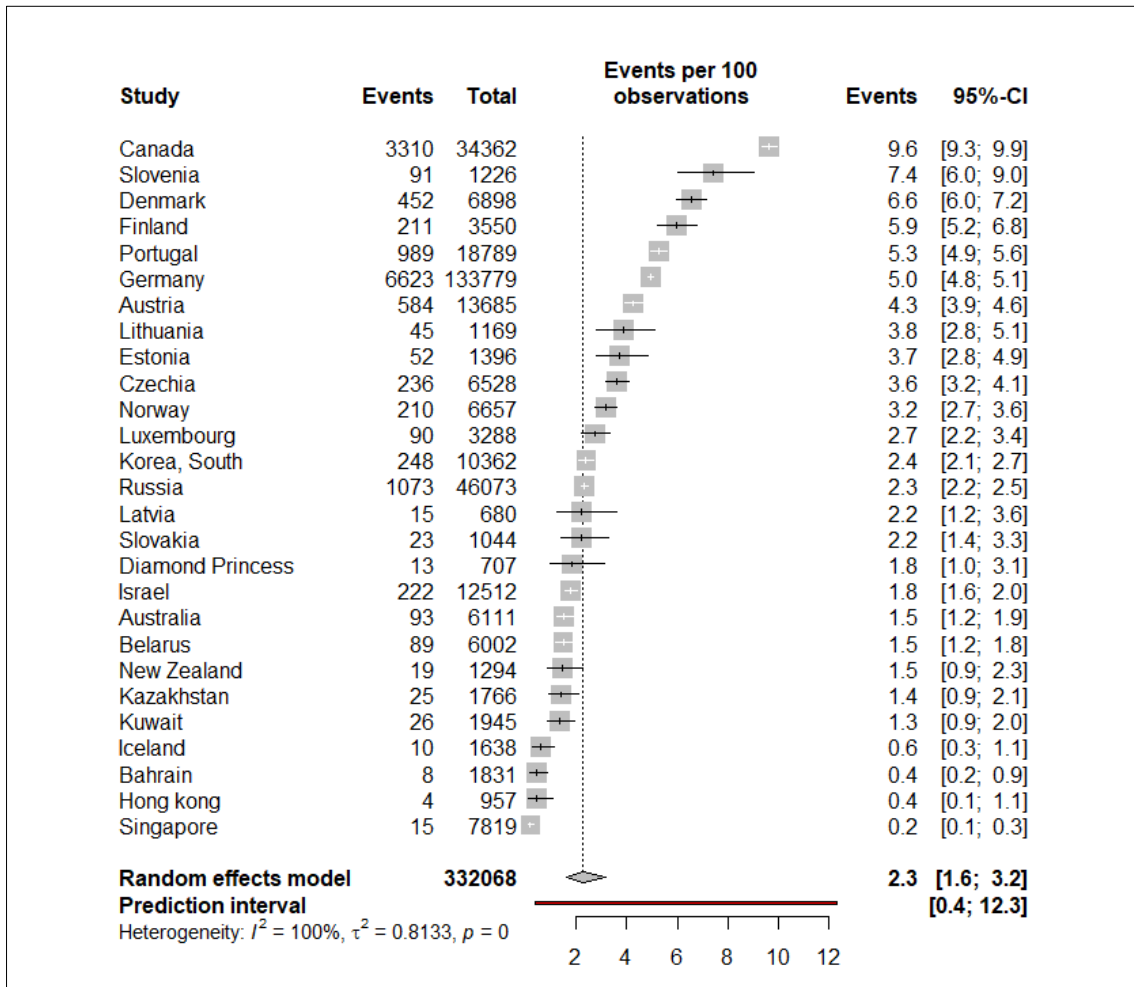

**Supplementary Figure S2.** Meta-analysis of the delay adjusted CFR across countries with high testing coverage and low positivity rate (sensitivity analysis)\*

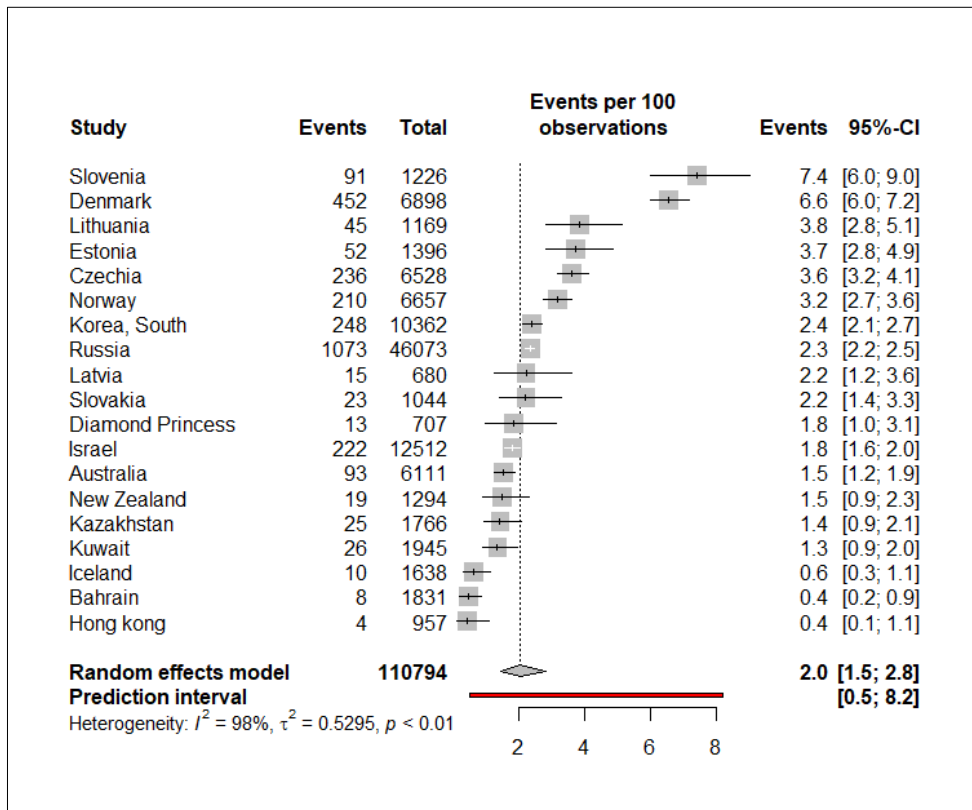

\*Includes countries with a positivity rate lower than 5%
